1 When to depart from a stopover site? Time since arrival matters more than current weather  
2 conditions

3 Sébastien Roques<sup>1,2</sup>, Pierre-Yves Henry<sup>3,4</sup>, Gaétan Guyot<sup>5</sup>, Bruno Bargain<sup>5</sup>, Emmanuelle  
4 Cam<sup>2,6</sup>, Roger Pradel<sup>1</sup>

5 <sup>1</sup>CEFE, CNRS, Université de Montpellier, Université Paul-Valéry Montpellier - EPHE,  
6 Montpellier Cedex 5 France

7 <sup>2</sup> Laboratoire Evolution et Diversité Biologique, UMR CNRS 5171, Bât 4R1, 118 route de  
8 Narbonne, Université Toulouse 3, Paul Sabatier, 31062 Toulouse Cedex 09, France

9 <sup>3</sup> Mécanismes adaptatifs et Evolution (MECADEV UMR 7179), Muséum National d'Histoire  
10 Naturelle, Centre National de la Recherche Scientifique, 1 avenue du Petit Château, F-91800  
11 Brunoy, France

12 <sup>4</sup> Centre de Recherches sur la Biologie des Populations d'Oiseaux (CRBPO), Centre  
13 d'Ecologie et des Sciences de la Conservation (CESCO UMR 7204), Muséum National  
14 d'Histoire Naturelle, Centre National de la Recherche Scientifique, Sorbonne Université,  
15 Bâtiment 135, CP135, 43 rue Buffon, F-75005 Paris, France

16 <sup>5</sup> Bretagne Vivante, 19 rue de Gouesnou - BP 62132, 29221 BREST CEDEX 2, France

17 <sup>6</sup> Univ Brest, CNRS, IRD, Ifremer, LEMAR, F-29280 Plouzané, France

18 Correspondence author: Sébastien Roques

19 E-mail: [se.roques@gmail.com](mailto:se.roques@gmail.com)

20

21

22 **Abstract**

23 On the journey to wintering sites, migratory birds usually alternate between flights and  
24 stopovers where they rest and refuel. Migration strategies are assumed to differ according to  
25 season: a time-minimization pre-breeding migration strategy towards breeding locations, and  
26 an energy-minimization post-breeding migration strategy to wintering ones. The duration of  
27 flights and stopovers determines the energy requirements and the total duration of the journey.  
28 Since migrating birds actually spend most of the time at stopovers, selection to minimize the  
29 amount of energy or time spent on migration is very likely to operate on the effectiveness of  
30 stopover rest and refueling. Here we address the relative contribution of factors to departure  
31 decisions from stopover sites during the post-breeding migration in a long-distance migratory  
32 songbird. When capture probability is low it is impossible to assess the variation in body  
33 condition over the entire duration of the stopover. To get around this, we use Time Since  
34 Arrival (TSA) as a proxy for the changes in the state of individuals during the stopover. We  
35 propose that TSA is an integrative proxy for resting, feeding and fattening efficiency. We  
36 develop a capture-recapture model to address the relationship between departure probability,  
37 estimated TSA, and weather conditions. Using a 20-year dataset from sedge warblers, we  
38 show that TSA has a larger effect on departure probability than weather conditions. Low  
39 humidity and an increase in atmospheric pressure in the days preceding departure are  
40 associated with higher departure probability, but these effects are smaller than that of TSA.

41

42 **Keywords:** Stopover, Time Since Arrival, Capture-Recapture, Sedge warbler, Bayesian  
43 inference

44

## 45 **Introduction**

46 Each year migratory birds species commute between breeding and wintering areas (Alerstam  
47 1990, Somveille et al. 2015). Most species cannot go from breeding to wintering grounds in a  
48 single flight of thousands of kilometers. They must stop to rest, feed and refill energy stores  
49 regularly (Alerstam 1990, Åkesson and Hedenström 2007, Schmaljohann and Eikenaar 2017,  
50 Schmaljohann 2018). The duration of migratory flights and stopovers determines the energy  
51 requirements and also the total duration of the journey. To maximize survival, individuals  
52 must optimize their journey to match with seasonal variation in food availability (and their  
53 energy requirements) at stopover sites and to arrive at wintering areas when resource  
54 availability is sufficient (Alerstam 1990, Somveille et al. 2015, 2018, 2019; Zúñiga et al.  
55 2017, Schmaljohann 2018). Birds spend much more time at stopover sites than in migratory  
56 flight, with almost 85% of the journey spent on stopover (Hedenström and Alerstam 1997,  
57 Green et al. 2002, Schmaljohann et al. 2012, Schmaljohann 2018). Consequently, selection to  
58 minimize the amount of energy spent (energy minimization) or the total time spent on  
59 migration (time minimization) likely operates mainly on the effectiveness of stopover rest and  
60 refueling (Hedenström and Alerstam 1997, Schmaljohann 2018).

61 Deciding to leave the stopover site normally means a new flight of hundreds of kilometers.  
62 This movement itself, and its termination, are highly constrained by the maximal flight  
63 capacity (given the size of energy reserves and body size) and atmospheric conditions  
64 (Alerstam, 1990; Jenni & Schaub, 2003; Schmaljohann & Eikenaar, 2017; Wikelski et al.,  
65 2003). Once settled at a stopover site, the probability of departing (and the duration of the  
66 stay) depends on factors associated with the initiation of movement (i.e. to depart from the  
67 site) on fuel store, resting state, food availability, weather conditions and migratory  
68 experience (Jenni and Schaub 2003, Schmaljohann and Eikenaar 2017). Recent studies have

69 tried to disentangle the environmental factors driving departure decision (Schaub et al. 2008,  
70 Ktitorov et al. 2010, Arizaga et al. 2011, Deppe et al. 2015, Dossman et al. 2016,  
71 Schmaljohann and Eikenaar 2017). Weather conditions are usually considered through the  
72 constraint they impose on flight. Departure decision depends on wind speed and direction  
73 (tailwind assistance reduces the cost of flight; Tsvey et al. 2007, Arizaga et al. 2011, Ma et al.  
74 2011, Dossman et al. 2016). This decision also depends on rainfall or humidity which usually  
75 force birds to stay at the stopover site (Tsvey et al. 2007, Arizaga et al. 2011, Deppe et al.  
76 2015, Dossman et al. 2016). Last, cloud cover influences departure decision by decreasing  
77 visibility and the ability of birds to navigate (Zehnder et al. 2001, Åkesson and Hedenström  
78 2007).

79 But the internal state of the individual (resting state, fuel store, migratory experience) also  
80 largely influences departure decision: birds need to rest and reach a sufficient level of fuel  
81 store to perform the next migratory flight (Alerstam 1990, Hedenström and Alerstam 1997,  
82 Schaub et al. 2008, Goymann et al. 2010, Schmaljohann et al. 2012, Dossman et al. 2016,  
83 Schmaljohann and Eikenaar 2017, Moore et al. 2017, Anderson et al. 2019). Apart from  
84 resting to recover from extreme physical exercise and sleeping to recover from sleep  
85 deprivation during migratory flight (Schwilch et al. 2002), birds at stopover allocate most of  
86 their time and energy to foraging (Hedenström and Alerstam 1997, Cohen et al. 2014, Smith  
87 and McWilliams 2014). They are assumed to refill their energy stores as fast as possible, and  
88 to continue their migratory journey if their energy stores and weather conditions are favorable  
89 (Schmaljohann 2018). In addition, the ability to refuel and rest may depend on age or  
90 experience, which can lead individuals migrating for the first time (juveniles) and those that  
91 already traveled to wintering areas in the past (adults) to depart from stopover sites after stays  
92 of different durations or under different weather conditions (Deppe et al. 2015, Dossman et al.  
93 2016, Schmaljohann et al. 2018).

94 To our knowledge, the relative importance of individual internal state (resting state, fuel  
95 store) and weather conditions at determining departure probability has never been assessed  
96 within a single modelling framework. The different results of previous studies concerning the  
97 relationship between fuel store and departure probability could be due to different local  
98 constraints or to the migration strategy (time or energy-minimizing; Hedenström and  
99 Alerstam 1997; Schmaljohann 2018; Anderson et al. 2019). But more importantly, it could be  
100 due to the fact that fuel store can only be measured when individuals are captured (i.e., not  
101 necessarily at the very beginning and end of their stay). The lack of an effect of fuel store on  
102 departure probability could also arise because the method to jointly incorporate internal  
103 individual state and environmental covariates in the same capture-recapture (CR) framework  
104 was not available (Jenni and Schaub 2003, Schmaljohann and Eikenaar 2017). Here we define  
105 and estimate a variable that cannot be measured without using electronic devices: the time the  
106 individual has spent at the stopover site since its arrival: Time Since Arrival (Pledger et al.  
107 2008). Our goal is to assess the influence of TSA on departure probability using a long-term  
108 dataset created when electronic devices were not available, and to include a large number of  
109 individuals and years in the analysis. Despite limitations of retrospective analyses of long-  
110 term datasets (modern electronic techniques were not available), such datasets offer  
111 interesting opportunities: (i) large sample sizes to draw inference about departure probability  
112 using statistical approaches, and (ii) long time series of observations to characterize long-term  
113 patterns and yearly deviations from deep-rooted trends. Birds need to rest after a long distant  
114 migratory flight and fattening increases with the duration of the stay at stopover (Alerstam  
115 1990, Schwilch and Jenni 2001, Jenni and Schaub 2003, Schaub et al. 2008, Schmaljohann  
116 and Eikenaar 2017). We propose that Time Since Arrival (TSA) is an integrative proxy for the  
117 overall change in the internal state of stopovering birds. If this assumption is true, then  
118 departure probability should decrease as the TSA increases, and TSA should be a major

119 determinant of departure probability. Importantly, TSA must be estimated using an analytical  
120 technique accounting for the daily capture probability of marked individuals (i.e., the  
121 probability of capturing an individual that is alive and present in the site). This is a  
122 methodological challenge because investigators know neither the day when a bird arrives nor  
123 the day when it departs from the site. Many capture-recapture stopover studies have relied on  
124 the assumption that birds are captured for the first and last time on the exact days of arrival  
125 and departure from the site (Schmaljohann and Eikenaar 2017). This assumption is  
126 unrealistic: the probability that a bird is captured in a given day usually lies between 0.1 and  
127 0.2 (Schaub and Jenni 1999, Schaub et al. 2001, Moore et al. 2017), and the resulting  
128 “minimal stopover duration” (duration between first and last captures) strongly  
129 underestimates the actual stopover duration (by a factor that may be as large as 3; Schaub,  
130 Pradel, Jenni, & Lebreton, 2001). Estimating TSA requires the development of a statistical  
131 model accounting of imperfect detection probability.

132 Here we evaluate the contribution of estimated TSA and weather conditions to departure  
133 probability. We develop a capture-recapture model and analyze a long-term CR dataset from a  
134 long-distance migrant songbird at a stopover site. Since refueling seems to be the primary  
135 biological function of stopover (Schmaljohann and Eikenaar 2017, Schmaljohann 2018,  
136 Klinner et al. 2020), we hypothesize that TSA is be the main driver of departure probability in  
137 this long-distant migrant and that wind, humidity, cloud cover and atmospheric pressure have  
138 a secondary, but significant effect on the departure probability. Estimated TSA should be  
139 closer to the genuine duration of the individual’s stay than the time elapsed between the first  
140 and the last physical captures of the individual. If TSA integrates the overall changes in the  
141 individual internal state, this should help us detect the effect of stay duration on departure  
142 probability, if any. Moreover, we hypothesize that stopover duration differs according to

143 migratory experience, as documented in other studies (Deppe et al. 2015) and test for  
144 differences between juveniles and adults.

## 145 **Material and methods**

### 146 **Study area, sampling and dataset**

147 The study site is the Trunvel ringing station (Tréogat, Brittany, France; 47.8964859°N,  
148 4.3698274°W). Data from marked individuals have been collected using a standardized mist-  
149 netting protocol (including tape-luring; B. Bargain, C. Vansteenwegen, & J. Henry, 2002).  
150 Each captured bird was identified, ringed and aged. We used data collected from 1990 to  
151 2014, from the 1<sup>st</sup> to the 30<sup>th</sup> of August because 90% of the captures occur in this month. The  
152 years when the number of recaptures was too low were not used in analyses (less than 10  
153 birds recaptured only once). The Sedge Warbler (*Acrocephalus schoenobaenus*) is the most  
154 abundant species that stopovers at this site during its journey to winter quarters in sub-  
155 Saharan Africa. This 12-g songbird strictly depends on reedbeds where it essentially forages  
156 on one aphid species (*Hyalopterus prunii*) to refill energy stores (Bibby and Green 1981).

157 Between 1990 and 2014, 79,700 individuals have been marked (Dehorter and CRBPO 2015).  
158 Among all migrant songbirds that use this site, only a small fraction stays several days to rest  
159 and refuel (i.e. actual stopover; Warnock, 2010). The majority either continues migration by  
160 the following night, or moves to another stopover place (i.e., transients; Bächler & Schaub,  
161 2007; Schaub et al., 2008). As we aim to study the departure probability of birds that stayed  
162 over at the site, we analyzed only capture-recapture data from birds that were caught at least  
163 twice during a season (including recaptures during the same day). Hence, the estimated  
164 stopover duration applies only to the part of the population passing by the site and that stays  
165 for at least some hours or days. The sample we used included data from 683 adults and 4927

166 juveniles; their latest recapture occurred at the site on average  $3.4 \pm 3.6$  (SD) days after their  
167 first capture. The mean mass gain between first and last capture on individuals was  $0.48\text{g} \pm$   
168  $1.48$  (SD).

## 169 **Weather conditions**

170 Weather variables expected to influence daily departure probability (between day  $t-1$  and  $t$ )  
171 were: (i) wind (on day  $t-1$ ), (ii) relative humidity (on day  $t-1$ ), (iii) cloud cover during the  
172 night [i.e. between day  $t-1$  and  $t$ ; scale from 0 (no cloud) to 8 (complete sky cover)] (iv)  
173 atmospheric pressure; as birds likely perceive changes in pressure rather than pressure itself,  
174 we used the change in atmospheric pressure between day  $t$  and day  $t-1$  as a covariate (denoted  
175 as  $\Delta Pressure$  in hPa). Depending on its direction, wind can either facilitate flight (tailwind)  
176 or increase the cost of flight (headwind). To integrate both wind effects, we computed the  
177 wind covariate as in (Arizaga et al. 2011):

$$178 \text{ wind} = V \cos[\alpha_T - (180^\circ + \alpha_W)],$$

179 where  $V$  is wind speed (in  $m \cdot s^{-1}$ ),  $\alpha_T$  is the assumed departure direction ( $120^\circ$  according to  
180 recovery data; note that birds don't cross the Bay of Biscay, Dehorter and CRBPO 2015, so  
181  $120^\circ$  is almost the coast direction), and  $\alpha_W$  is the direction the wind (Åkesson et al. 2002).  
182 Since birds depart on migration at the end of the day (Müller et al. 2018), we used wind speed  
183 and direction observed during a period of time starting 2 hours before sunset on day  $t-1$  and  
184 ending in the middle of the night on day  $t$ . All weather covariates were scaled prior to the  
185 analyses. The weather data were provided by the Penmarch meteorological station  
186 (47.797537, -4.374768).

## 187 **Modelling & statistical analyses**



188 We used a formulation of the Jolly-Seber (JS) model (Jolly 1965, Seber 1965) parameterized  
189 with entry probability in the sampling area (Crosbie and Manly 1985, Schwarz and Arnason  
190 1996). This allows modeling the arrival of birds at the stopover site and estimating stopover  
191 duration (Lyons et al. 2016, Lok et al. 2019, Roques et al. 2020). The parameters of the model  
192 are:

193  $\phi_t$  Probability of staying in the sampling area from day  $t$  to  $t+1$ ,

194  $\eta_t$  Probability of arriving at the stopover area on day  $t$  given that the individual was not  
195 present in the site before,

196  $p_t$  Probability of capturing the individual on day  $t$  given that the individual has arrived and  
197 has not yet left the site.

198 We used the Bayesian, state-space formulation of the JS model (Gimenez et al. 2007, Royle  
199 2008). This model contains a submodel for the state process: true, partially unobservable states  
200 are “not yet arrived”, “present in the study area”, and “departed”. The model also includes a  
201 submodel for the observations (conditional on true state) directly encoded in the individual  
202 capture histories. For each individual capture history  $h_i$ , the true state history is accounted for  
203 by the vector  $z_i$ . This vector of binary state variables describes if an individual  $i$  is present in  
204 the stopover area on day  $t$ ,  $z_{i,t} = 1$ , or not,  $z_{i,t} = 0$ .

205 The state process is defined as:

$$z_{i,t} | z_{i,t-1} \sim \text{Bernoulli} \left( \phi_{t-1} z_{i,t-1} + \eta_t \prod_{j=1}^{t-1} (1 - z_{i,j}) \right)$$

206 The term  $\prod_{j=1}^{t-1}(1 - z_{i,j})$  accounts for the availability of the individual to enter the stopover  
207 area and is equal to 1 when the individual has not yet entered the stopover area, and 0 when it  
208 has already entered.

209 As the binary observations are conditionally independent Bernoulli random variables, the link  
210 between the state and observation processes is given by the following equation:

$$h_{i,t}|z_{i,t} \sim \text{Bernoulli}(z_{i,t}, p_t)$$

211 This means that if individual  $i$  has not yet entered the stopover area or has left ( $z_{i,t} = 0$ ), then  
212  $h_{i,t} = 0$  with probability equal to 1. If  $z_{i,t} = 1$ , then the capture history  $h_{i,t}$  is a Bernoulli trial  
213 with probability  $p_t$ , which is the probability of capturing the individual on day  $t$ . This  
214 formulation allows us to estimate TSA for each individual. The TSA covariate is a partially-  
215 or non-observable variable computed using the sum of true states  $z_{i,t}$ . TSA accounts for the  
216 time individual  $i$  has already spent in the stopover area on day  $t$ :

$$TSA_{i,t} = \sum_{s=1}^{t-1} z_{i,s}$$

217 The state vector  $z_i$  also allows us to use a new formulation of the stopover duration described  
218 in Lyons et al. (2016). We computed the mean stopover duration (in days) as follows:

$$SOD = \frac{\sum_i \sum_t z_{i,t}}{n}$$

219 where  $n$  is the number of individuals and  $z$  the true state variable (whether individual  $i$  was  
220 present or not at the stopover site on day  $t$ ).

221 To account for heterogeneity in detection probability among capture occasions and limit the  
222 number of parameters to estimate, we modeled detection probability as a random effect.

223 Hence, we modeled  $p$  as:

$$224 \quad \text{logit}(p) \sim \text{Norm}(\text{logit}(\mu_p), \sigma_p),$$

225 where  $\mu_p$ , is the mean recapture probability and  $\sigma_p$  the standard deviation of the random effect.

226 We expressed the probability of remaining at the site as a function of the previously defined  
227 weather covariates and TSA. We considered effects as ‘statistically significant’ when the  
228 estimated slope corresponding to these covariates had a 95% credible interval excluding 0  
229 (Kéry and Schaub 2011). We analyzed the 20 years of data simultaneously, but accounted for  
230 potential differences among years (Péron et al. 2007) by means of a random year effect,  
231 where  $y$  is the number of the year:

$$\text{Year}_y \sim \text{Norm}(\mu_{\text{year}}, \sigma_{\text{year}})$$

232 To account for the effect of the experience on an individual’s departure probability from the  
233 stopover site, we used age-dependent random effects with 2 age classes (Adult and Juvenile),

234 where  $a$  is the age class:

$$\text{Age}_a \sim \text{Norm}(\mu_{\text{Age}}, \sigma_{\text{Age}})$$

235 Using a logit link, the probability of staying at the stopover area between  $t - 1$  and  $t$  was  
236 formulated as:

$$\begin{aligned} \text{Logit}(\phi_{i,t-1}) &= \alpha + \beta_1 * TSA_{i,t-1} + \beta_2 * wind_{t-1} + \beta_3 * temperature_{t-1} + \beta_4 \\ &* cloudcover_{t-1} + \beta_5 * humidity_{t-1} + \beta_6 * \Delta\text{Pressure} + Year_y \\ &+ Age_a \end{aligned}$$

237 Here we included all the covariates in the model despite a non-null collinearity between most  
238 of the environmental covariates (see online Supplementary material for details). However,  
239 this collinearity appeared sufficiently small to allow the inclusion of all effects in a same  
240 model (Hair et al. 2006). Also, because TSA is computed at each occasion for each  
241 individual, TSA cannot be standardized prior to analyses. To compare the effect of TSA on  
242 departure probability to that of weather covariates, we calculated the effect of a standardized  
243 TSA by multiplying the estimated values of the TSA slopes ( $\beta_1$ ) by the standard deviation of  
244 all estimated TSA values.

245 We performed analyses with JAGS (with the package R2jags, Hornik et al. 2003; Su et al.  
246 2015) using R version 3.6.1 (R Development Core Team 3.0.1. 2013). We used 60 000  
247 iterations with a burnin of 30 000, and we checked chain mixing and convergence (Kéry and  
248 Schaub 2011). The JAGS code is available in the online Supplementary material.

## 249 **Results**

250 The mean estimated stopover duration for the whole study period is  $12.5 \pm 2.2$  days CI [12.2;  
251 12.8], with unstructured variation among years (Figure 1). Adults (experienced birds) stay on  
252 average 1.6 days more than juveniles (naive birds) ( $13.8 \pm 2.2$  for adults, and  $12.2 \pm 2.1$  days  
253 for juveniles; this age difference is robust through years; Figure 1). However, the 95%  
254 credible intervals and standard deviation of estimated stopover duration for juveniles and  
255 adults overlap (Figure 1) and therefore age accounts for a very limited part of the variation in

256 stopover duration between individuals. This suggests that factors other than migratory  
257 experience and covariates accounted for in this study also determine departure probability.

258 Departure probability from the stopover site between two days ( $1-\phi_t$ , i.e. the complement of  
259 the probability of staying at the stopover site) is positively related to TSA (Figure legends and  
260 Figure 2). In other words, the longer a bird has already stayed at the site, the higher its  
261 probability of resuming migration flight by the following night. TSA is the most important  
262 predictor of departure probability compared to other variables, based on effect sizes (Table 1).  
263 TSA effect is also the effect that is estimated with the largest precision, which suggests a  
264 small variability of the TSA effect among individuals (see CI in Table 1).

265 Both humidity and  $\Delta$ Pressure have an effect on the departure probability from the stopover  
266 site (Table 1). Departure probability increases with drier conditions and large changes in  
267 pressure ( $\Delta$ pressure). We did not find evidence of an effect of wind on departure probability  
268 (Table 1). We found slight evidence of a negative effect of cloud cover on the departure  
269 probability from the stopover site (Table 1), but the robustness of this result is weak because  
270 one boundary of the CI overlaps 0. Estimates of TSA and humidity effects on departure  
271 probability (Figure 2A) or of  $\Delta$ pressure (Figure 2B) show that departure probability  
272 primarily depends on TSA, and that weather covariates have a smaller influence on this  
273 probability.

## 274 **Discussion**

### 275 **Effect of the Time Since Arrival on departure probability**

276 Our statistical framework to address covariates influencing the probability of leaving a  
277 stopover site allowed us to provide evidence that TSA is the major determinant of this  
278 probability for the Sedge Warbler at our studied area. TSA is a reliable indicator of the

279 propensity of an individual to leave the stopover site. We acknowledge that TSA is only a  
280 proxy of all the changes in the individual ‘state’ (*sensu* Clark and Mangel 2000) during the  
281 stopover, but it is reasonable to think that TSA reflects the progressive change in the  
282 individual internal state. On the first day after arrival, birds are supposed to be exhausted,  
283 starving and to lack fuel stores. The longer they stay, the more opportunities they have to rest,  
284 feed and fatten (Schmaljohann and Eikenaar 2017).

285 TSA encompasses different functions of the stopover behavior: (i) resting after a migratory  
286 flight (McWilliams et al. 2004, Skrip et al. 2015), and (ii) reaching a sufficient level of fuel  
287 load to perform the following migratory flight (Schmaljohann and Eikenaar 2017). TSA also  
288 reflects (iii) the refueling rate, which depends on environmental conditions and physiological  
289 processes involved in refueling (Jenni and Schaub 2003, Schmaljohann and Eikenaar 2017).  
290 Here, TSA has a positive effect on departure probability: birds need to stay a sufficient  
291 number of days before leaving. For birds that do fatten, the fattening (or fuel deposition)  
292 increases through time: the longer individuals stopover, the larger their last measured body  
293 mass or fuel load (mean mass gain of 0.48g in this study; T. Alerstam, 1990; Schmaljohann &  
294 Eikenaar, 2017) and the larger the daily mass gain (Péron et al. 2007). Consequently, it is  
295 reasonable to think that birds need to rebuild a sufficient level of fuel store to perform another  
296 migratory flight (Alerstam 1990). Moreover, the resting time after a long migratory flight is  
297 apparently brief and confined to the first hours or days of the stopover (Fuchs et al. 2006,  
298 2009; Németh 2009). This suggests that resting is not the physiological process that requires a  
299 12-day stopover. Rather, most of the time spent in stopover is allocated to foraging in order to  
300 refill energy reserves; the latter is a long and progressive process. Hence, for the fraction of  
301 birds that stopover at this place, we believe that TSA reflects the time required by the  
302 physiological processes involved in refueling. Determining the precise relationship between

303 TSA and fuel store will be an important area of future research in stopover ecology and more  
304 specifically for the application of the present modelling framework.

305 Traditional measures of fuel store such as size-scaled body mass or fat score have some  
306 limitations (extensively discussed in Schmaljohann & Eikenaar, 2017; Schwilch & Jenni,  
307 2001), of which we want to highlight two. (i) In many long-term migration monitoring  
308 programs of marked birds, especially in old datasets, body mass was not systematically  
309 recorded at each recapture event. This drastically reduces the sample size available for long  
310 term analyses where we need a body mass measurement at each recapture. In the French  
311 dataset for the Sedge Warbler, in the twentieth century, individuals were weighed on only  
312 60% of the capture events (Dehorter and CRBPO 2015). Nowadays (2000-2016 period),  
313 individuals are weighed on nearly all the capture events (90%). (ii) Since the probability of  
314 being captured in a given day can be low in routine trapping protocols (0.161 [0.058, 0.376]  
315 in this study; Schaub et al. 2001, Schmaljohann and Eikenaar 2017), the body mass measured  
316 at the latest capture is unlikely to be representative of the body mass that actually triggers  
317 departure. Imperfect detection probability is a common situation where modeling the  
318 individual history before the first capture is required to estimate arrival date. This imprecision  
319 in the assessment of the body mass change through time can mask the effect of body mass on  
320 departure probability in datasets where daily capture probability is low. Overall, the proposed  
321 analytical method, relying on TSA, allows analyzing individual variations in stopover  
322 duration over long time series, even in absence of biometric data, and even when body mass  
323 or fat score information are too sparse to reliably document the progress through time of the  
324 energetic state of each monitored individual.

325

326 Using TSA as a proxy for the internal state of the bird just before departure make some  
327 critical assumptions. When birds stay only few days, they may not improve condition with  
328 time spent at the stopover site because they may first continue to degrade upon arrival waiting  
329 for their digestive system to redevelop to refuel after a long-distant migratory flight  
330 (McWilliams et al. 2004). To overcome this situation, further research on the refueling  
331 process during stopover may be helpful to better model the TSA effect. The relevance of TSA  
332 may also be limited when birds relocate in the vicinity of the study site (Bächler and Schaub  
333 2007): in this case the departure from the study site does not mean that individuals are  
334 resuming a long-distance migratory flight. Birds relocating a few kilometers away from the  
335 study site do not need to wait until their internal state improves before leaving the site. To get  
336 around these problems, birds captured only once are usually removed from capture-recapture  
337 datasets. This removes most of the transient individuals (Mills et al. 2011, Taylor et al. 2011,  
338 Sjöberg et al. 2015). Including both estimated TSA and fuel store data (body mass, fat score)  
339 into a model would be an interesting avenue to revisit previous analyses. This will help  
340 understand the contrasted results of previous studies about fuel store effects on departure  
341 probability (Tsvey et al. 2007, Schaub et al. 2008, Arizaga et al. 2011, Smith and McWilliams  
342 2014, Schmaljohann and Eikenaar 2017). Also, other limitations, more related to modelling  
343 and data, appear when we use this type of model. It requires a large amount of recapture to  
344 test for more precise effects of the various determinants of departure probability. Interactions  
345 between TSA and date or TSA and age could have been tested. However, to correctly  
346 estimate the interaction, it is possible that it would have been necessary to drastically reduce  
347 the dataset to keep individuals captured at least three times, which does not exist for some  
348 years of our dataset. This would be interesting avenues to test on a dataset with a higher  
349 detection probability, for example with a capture-mark-resight shorebirds dataset (Lok et al.  
350 2019).



351 **Effect of weather conditions on departure probability**

352 In relatively humid days, birds tend to postpone departure. Birds wait for dryer conditions to  
353 resume their migratory flight. Humidity can be high even in absence of precipitation in  
354 Western Brittany. The negative effect of high humidity can reflect not only the inhibitory  
355 effect of rain, but also the increased flight cost when the air is very humid (Åkesson et al.  
356 2001, Deppe et al. 2015). The probability of departing from the stopover site increases when  
357 atmospheric pressure increases between the day before the night of departure and two days  
358 before. When birds perceive an increase in pressure (indicative of improving, anticyclonic  
359 conditions), this could encourage them to resume migration flight by the following night.  
360 Unexpectedly, departure probability does not depend on wind, probably because wind was too  
361 rare and weak in the study area in August to be influential (mean wind force during the study  
362 period was  $5 \text{ m.s}^{-1}$ , see Supplementary material for a summary of the weather covariates).

363 **Effect of migratory experience on departure probability**

364 Juveniles (birds migrating for the first time) stay on average 1.6 days (11.6%) less than the  
365 older, more experienced birds at the stopover area. Even though this account for a limited  
366 variation in stopover duration in our study and also that there is no consensus about the age  
367 effect on stopover strategy (Hake et al. 2003, Moore et al. 2017), this result is consistent with  
368 former studies that have shown that juvenile and experienced birds behave differently  
369 regarding departure probability from stopover sites: juveniles make shorter and more frequent  
370 stopovers than adults (Reilly and Reilly 2009, McKinnon et al. 2014). However, other studies  
371 reached opposite conclusions: telemetry studies of departure decisions in songbirds in the  
372 Gulf of Mexico during autumn did not find any effect of age on the decision to cross the Gulf  
373 of Mexico, or of the selection of weather conditions (McKinnon et al. 2014, Deppe et al.  
374 2015). Again, it is legitimate to ask whether imperfect detection probability is involved in

375 inconsistencies among studies concerning the relationship between age and departure  
376 probability from stopover sites.

### 377 **Respective effects of TSA and weather conditions on departure probability**

378 In this study, we show that the contribution of TSA to departure probability in a long-distant  
379 migrant is larger than that of weather conditions. This suggests that even when weather  
380 conditions are favorable to departure, birds need to stay before departing. To our knowledge,  
381 this is the first time that the contributions of these factors were estimated with a capture-  
382 recapture model. Nevertheless, our result is consistent with numerous studies that have  
383 highlighted the key role of the improvement of the individual internal state (fuel store, fuel  
384 deposition rate, body condition, body mass, resting) on departure decisions from a stopover  
385 site (see Schmaljohann and Eikenaar 2017 for a review and Anderson et al. (2019) for a  
386 recent study with telemetry tools).

387 The improvement of the internal state during a stopover could be indirectly related to  
388 environmental conditions. Indeed, harsh weather can decrease the ability of individuals to  
389 feed and food abundance in the stopover area. This likely leads to a decrease in the rate at  
390 which birds accumulate energy (Jenni and Schaub 2003). If this holds, weather conditions can  
391 affect TSA and stopover duration. Interestingly, here we found slight evidence of an effect of  
392 weather conditions on departure probability while TSA was taken into account in the analysis.  
393 The relationship between TSA and weather conditions during the stopover should be  
394 addressed in future work to better understand the processes involved in departure decisions  
395 from a stopover site.

396 Recent studies also highlighted that migration distance affects the stopover strategy of birds  
397 (Anderson et al. 2019) and that birds also behave differently between stopover sites along

398 their journey (Schmaljohann et al. 2017). Concerning the Sedge Warbler at our studied site,  
399 we have no clues from a specific origin (controls indicate birds from Great Britain,  
400 Scandinavia, Eastern Europe; Dehorter and CRBPO 2015) or a final destination. However, as  
401 we only study one species which is strictly trans-saharian, the variability of stopover strategy  
402 induced by migration distance may be limited.

### 403 **Conclusions**

404 We incorporated TSA, a partially hidden individual state, and weather conditions in the same  
405 capture-recapture modeling framework to disentangle the factors playing a part in the decision  
406 to depart from a stopover site. Using a long-term dataset, we showed that TSA is the main  
407 driver of departure probability (and of stopover duration) in a long-distant migrant songbird.  
408 This approach will allow investigating the determinants of stopover duration and departure  
409 probability (not only weather variables but also some hidden physiological processes  
410 accounted for by TSA) in hundreds of existing long-term datasets, where there is no, or  
411 scattered information about mass or fat score. We demonstrated the feasibility and relevance  
412 of this analytical approach using data from one site, one species and over a large period of  
413 time. Our modeling approach will have to be used with data from several species, at several  
414 sites, to assess the robustness and generality of our conclusion about the major influence of  
415 TSA on the time when individuals decide to leave stopover sites.

416 TSA also has broader implications outside migration ecology in situations where the time  
417 individuals spend on sites is a partially observable variable. For example, in behavioral  
418 ecology and foraging ecology, the probability of an individual changing foraging site could  
419 also depend on the time spent in a site, the number of competitors, or food availability. TSA  
420 opens large perspectives when behaviour depends on the time spent in a site, in a specific

421 state, and when detection probability is imperfect at the time scale relevant to the research  
422 topic addressed.

### 423 **Acknowledgements**

424 This study was made possible thanks to tens of bird ringers and hundreds of assistants who  
425 volunteered in this long-term monitoring over three decades, and the continued support of the  
426 Société d'Etude de la Protection et de la Nature de Bretagne / Bretagne Vivante. This study  
427 was supervised by the Centre de Recherches sur la Biologie des Populations d'Oiseaux  
428 (CRBPO), the Museum National d'Histoire Naturelle, the CNRS and the Ministère de  
429 l'Environnement. This work was carried out in accordance with standard animal care  
430 protocols approved by the CRBPO. Emmanuelle Cam was supported by the French  
431 Laboratory of Excellence project "TULIP" (ANR-10-LABX-41; ANR-11-IDEX-0002-02).

### 432 **Data availability statement**

433 Data used to conduct the analyses is available on the github account of the corresponding  
434 author at the following link [https://github.com/sebroques/Article\\_Sedge\\_warbler](https://github.com/sebroques/Article_Sedge_warbler)

### 435 **References**

436 Åkesson, S., and A. Hedenström (2007). How Migrants Get There: Migratory Performance  
437 and Orientation. *BioScience* 57:123–133.

438 Åkesson, S., G. Walinder, L. Karlsson, and S. Ehnбом (2001). Reed warbler orientation:  
439 Initiation of nocturnal migratory flights in relation to visibility of celestial cues at dusk.  
440 *Animal Behaviour* 61:181–189.

441 Åkesson, S., G. Walinder, L. Karlsson, and S. Ehnбом (2002). Nocturnal migratory flight  
442 initiation in reed warblers *Acrocephalus scirpaceus*: Effect of wind on orientation and

- 443 timing of migration. *Journal of Avian Biology* 33:349–357.
- 444 Alerstam, T. (1990). *Bird migration*. Cambridge University Press.
- 445 Anderson, A. M., S. Duijns, P. A. Smith, C. Friis, and E. Nol (2019). Migration Distance and  
446 Body Condition Influence Shorebird Migration Strategies and Stopover Decisions  
447 During Southbound Migration. *Frontiers in Ecology and Evolution* 7:1–14.
- 448 Arizaga, J., E. J. Belda, and E. Barba (2011). Effect of fuel load, date, rain and wind on  
449 departure decisions of a migratory passerine. *Journal of Ornithology* 152:991–999.
- 450 B. Bargain, C. Vansteenwegen, and J. Henry (2002). Importance des marais de la baie  
451 d’Audierne (Bretagne) pour la migration du phragmite des joncs *Acrocephalus*  
452 *schoenobaenus*. *Alauda* 70:37–55.
- 453 Bächler, E., and M. Schaub (2007). the Effects of Permanent Local Emigration and Encounter  
454 Technique on Stopover Duration Estimates As Revealed By Telemetry and Mark-  
455 Recapture. *The Condor* 109:142–154.
- 456 Bibby, C. J., and R. E. Green (1981). Autumn migration strategies of Reed and Sedge  
457 Warblers. *Ornis Scandinavica* 12:1–12.
- 458 Clark, C. W., and M. Mangel (2000). *Dynamic state variable models in ecology: methods and*  
459 *applications*. Oxford University Press on Demand.
- 460 Cohen, E. B., F. R. Moore, and R. A. Fischer (2014). Fuel stores, time of spring, and  
461 movement behavior influence stopover duration of Red-eyed Vireo *Vireo olivaceus*.  
462 *Journal of Ornithology* 155:785–792.
- 463 Crosbie, S. F., and B. F. J. Manly (1985). Parsimonious Modelling of Capture-Mark-

- 464 Recapture Studies. *Biometrics* 41:385.
- 465 Dehorter, O., and CRBPO (2015). Bird ringing and movement database for France. Centre de  
466 Recherches sur la Biologie des Populations d'Oiseaux, Muséum National d'Histoire  
467 Naturelle, Paris, France. <http://crbpo.mnhn.fr/>. Consulté le / Accessed on 21 August  
468 2015.
- 469 Deppe, J. L., M. P. Ward, R. T. Bolus, R. H. Diehl, A. Celis-Murillo, T. J. Zenzal, F. R.  
470 Moore, T. J. Benson, J. A. Smolinsky, L. N. Schofield, D. A. Enstrom, et al. (2015). Fat,  
471 weather, and date affect migratory songbirds' departure decisions, routes, and time it  
472 takes to cross the Gulf of Mexico. *Proceedings of the National Academy of Sciences*  
473 112:E6331–E6338.
- 474 Dossman, B. C., G. W. Mitchell, D. R. Norris, P. D. Taylor, C. G. Guglielmo, S. N.  
475 Matthews, and P. G. Rodewald (2016). The effects of wind and fuel stores on stopover  
476 departure behavior across a migratory barrier. *Behavioral Ecology* 27:567–574.
- 477 Fuchs, T., A. Haney, T. J. Jechura, F. R. Moore, and V. P. Bingman (2006). Daytime naps in  
478 night-migrating birds: behavioural adaptation to seasonal sleep deprivation in the  
479 Swainson's thrush, *Catharus ustulatus*. *Animal Behaviour* 72:951–958.
- 480 Fuchs, T., D. Maury, F. R. Moore, and V. P. Bingman (2009). Daytime micro-naps in a  
481 nocturnal migrant: An EEG analysis. *Biology Letters* 5:77–80.
- 482 Gimenez, O., V. Rossi, R. Choquet, C. Dehais, B. Doris, H. Varella, J. P. Vila, and R. Pradel  
483 (2007). State-space modelling of data on marked individuals. *Ecological Modelling*  
484 206:431–438.
- 485 Goymann, W., F. Spina, A. Ferri, and L. Fusani (2010). Body fat influences departure from

- 486 stopover sites in migratory birds: evidence from whole-island telemetry. *Biology Letters*  
487 6:478–481.
- 488 Green, M., T. Alerstam, P. Clausen, R. Drent, and B. S. Ebbinge (2002). Dark-bellied Brent  
489 Geese *Branta bernicla bernicla*, as recorded by satellite telemetry, do not minimize flight  
490 distance during spring migration. *Ibis* 144:106–121.
- 491 Hair, J. F., W. C. Black, B. J. Babin, R. E. Anderson, and R. L. Tatham (2006). *Multivariate*  
492 *data analysis* (Vol. 6).
- 493 Hake, M., N. Kjellén, and T. Alerstam (2003). Age-dependent migration strategy in honey  
494 buzzards *Pernis apivorus* tracked by satellite. *Oikos*. pp. 385–396.
- 495 Hedenström, A., and T. Alerstam (1997). Optimum fuel loads in migratory birds:  
496 Distinguishing between time and energy minimization. *Journal of Theoretical Biology*  
497 189:227–234.
- 498 Hornik, K., F. Leisch, A. Zeileis, and M. Plummer (2003). *JAGS: A Program for Analysis of*  
499 *Bayesian Graphical Models Using Gibbs Sampling*.
- 500 Jenni, L., and M. Schaub (2003). Behavioural and Physiological Reactions to Environmental  
501 Variation in Bird Migration: a Review. *Avian Migration*. [Online.] Available at  
502 [http://link.springer.com/10.1007/978-3-662-05957-9\\_10](http://link.springer.com/10.1007/978-3-662-05957-9_10).
- 503 Jolly, G. M. (1965). Explicit Estimates from Capture-Recapture Data with Both Death and  
504 Immigration-Stochastic Model. *Biometrika* 52:225.
- 505 Kéry, M., and M. Schaub (2011). *Bayesian Population Analysis using WinBUGS: A*  
506 *hierarchical perspective*. Academic Press.

- 507 Klinner, T., J. Buddemeier, F. Bairlein, and H. Schmaljohann (2020). Decision-making in  
508 migratory birds at stopover: an interplay of energy stores and feeding conditions.  
509 *Behavioral Ecology and Sociobiology* 74:1–14.
- 510 Ktitorov, P., A. Tsvey, and A. Mukhin (2010). The good and the bad stopover: Behaviours of  
511 migrant reed warblers at two contrasting sites. *Behavioral Ecology and Sociobiology*  
512 64:1135–1143.
- 513 Lok, T., C. J. Hassell, T. Piersma, R. Pradel, and O. Gimenez (2019). Accounting for  
514 heterogeneity when estimating stopover duration, timing and population size of red knots  
515 along the Luannan Coast of Bohai Bay, China. *Ecology and Evolution* 9:6176–6188.
- 516 Lyons, J. E., W. L. Kendall, J. A. Royle, S. J. Converse, B. A. Andres, and J. B. Buchanan  
517 (2016). Population size and stopover duration estimation using mark-resight data and  
518 Bayesian analysis of a superpopulation model. *Biometrics* 72:262–271.
- 519 Ma, Z., N. Hua, X. Zhang, H. Guo, B. Zhao, Q. Ma, W. Xue, and C. Tang (2011). Wind  
520 conditions affect stopover decisions and fuel stores of shorebirds migrating through the  
521 south Yellow Sea. *Ibis* 153:755–767.
- 522 McKinnon, E. A., K. C. Fraser, C. Q. Stanley, and B. J. M. Stutchbury (2014). Tracking from  
523 the tropics reveals behaviour of juvenile songbirds on their first spring migration. *PLoS*  
524 *ONE* 9:e105605.
- 525 McWilliams, S. R., C. Guglielmo, B. Pierce, and M. Klaassen (2004). Flying, fasting, and  
526 feeding in birds during migration: A nutritional and physiological ecology perspective.  
527 *Journal of Avian Biology*.
- 528 Mills, A. M., B. G. Thurber, S. A. Mackenzie, and P. D. Taylor (2011). Passerines Use



- 529 Nocturnal Flights for Landscape-Scale Movements during Migration Stopover. *The*  
530 *Condor* 113:597–607.
- 531 Moore, F. R., K. M. Covino, W. B. Lewis, T. J. Zenzal, and T. J. Benson (2017). Effect of  
532 fuel deposition rate on departure fuel load of migratory songbirds during spring stopover  
533 along the northern coast of the Gulf of Mexico. *Journal of Avian Biology* 48:123–132.
- 534 Müller, F., C. Eikenaar, Z. J. Crysler, P. D. Taylor, and H. Schmaljohann (2018). Nocturnal  
535 departure timing in songbirds facing distinct migratory challenges. *Journal of Animal*  
536 *Ecology* 87:1102–1115.
- 537 Németh, Z. (2009). Observation of Daytime Sleep-like Behavior in a Migratory Songbird  
538 during Stopover. *The Wilson Journal of Ornithology* 121:644–646.
- 539 Péron, G., P. Y. Henry, P. Provost, O. Dehorter, and R. Julliard (2007). Climate changes and  
540 post-nuptial migration strategy by two reedbed passerines. *Climate Research* 35:147–  
541 157.
- 542 Pledger, S., M. Efford, K. Pollock, J. Collazo, and J. Lyons (2008). Stopover Duration  
543 Analysis with Departure Probability Dependent on Unknown Time Since Arrival. In  
544 *Modeling Demographic Processes in Marked Populations*. pp. 349–363.
- 545 R Development Core Team 3.0.1. (2013). A Language and Environment for Statistical  
546 Computing. R Foundation for Statistical Computing 2:<https://www.R-project.org>.
- 547 Reilly, J. R., and R. J. Reilly (2009). Bet-hedging and the orientation of juvenile passerines in  
548 fall migration. *Journal of Animal Ecology* 78:990–1001.
- 549 Roques, S., D. B. Lank, E. Cam, and R. Pradel (2020). More Than Just Refuelling: Lengthy  
550 Stopover and Selection of Departure Weather by Sandpipers Prior to Transoceanic and

- 551 Transcontinental Flights. *Ibis*:ibi.12891.
- 552 Royle, J. A. (2008). Modeling Individual Effects in the Cormack-Jolly-Seber Model: A State-  
553 Space Formulation. *Biometrics* 64:364–370.
- 554 Schaub, M., and L. Jenni (1999). Does Tape-Luring of Migrating Eurasian Reed-Warblers  
555 Increase Number of Recruits or Capture Probability? *The Auk* 116:1047–1053.
- 556 Schaub, M., L. Jenni, and F. Bairlein (2008). Fuel stores, fuel accumulation, and the decision  
557 to depart from a migration stopover site. *Behavioral Ecology* 19:657–666.
- 558 Schaub, M., R. Pradel, L. Jenni, and J. D. Lebreton (2001). Migrating birds stop over longer  
559 than usually thought: An improved capture-recapture analysis. *Ecology* 82:852–859.
- 560 Schmaljohann, H. (2018). Proximate mechanisms affecting seasonal differences in migration  
561 speed of avian species. *Scientific Reports* 8:1–10.
- 562 Schmaljohann, H., and C. Eikenaar (2017). How do energy stores and changes in these affect  
563 departure decisions by migratory birds? A critical view on stopover ecology studies and  
564 some future perspectives. *Journal of Comparative Physiology A: Neuroethology,*  
565 *Sensory, Neural, and Behavioral Physiology* 203:411–429.
- 566 Schmaljohann, H., J. W. Fox, and F. Bairlein (2012). Phenotypic response to environmental  
567 cues, orientation and migration costs in songbirds flying halfway around the world.  
568 *Animal Behaviour* 84:623–640.
- 569 Schmaljohann, H., S. Lisovski, and F. Bairlein (2017). Flexible reaction norms to  
570 environmental variables along the migration route and the significance of stopover  
571 duration for total speed of migration in a songbird migrant. *Frontiers in Zoology* 14:17.

- 572 Schmaljohann, H., F. Müller, T. Klinner, and C. Eikenaar (2018). Potential age differences in  
573 the migratory behaviour of a nocturnal songbird migrant during autumn and spring.  
574 *Journal of Avian Biology* 49:1–16.
- 575 Schwarz, C. J., and A. N. Arnason (1996). A General Methodology for the Analysis of  
576 Capture-Recapture Experiments in Open Populations. *Biometrics* 52:860.
- 577 Schwilch, R., and L. Jenni (2001). Low initial refueling rate at stopover sites: a  
578 methodological effect? *The Auk* 118:698–708.
- 579 Schwilch, R., L. Jenni, T. Piersma, and N. M. A. Holmgren (2002). Do migratory birds need a  
580 nap after a long non-stop flight? *Ardea* 90:149–154.
- 581 Seber, G. A. F. (1965). A Note on the Multiple-Recapture Census. *Biometrika* 52:249.
- 582 Sjöberg, S., T. Alerstam, S. Åkesson, A. Schulz, A. Weidauer, T. Coppack, and R. Muheim  
583 (2015). Weather and fuel reserves determine departure and flight decisions in passerines  
584 migrating across the Baltic Sea. *Animal Behaviour* 104:59–68.
- 585 Skrip, M. M., U. Bauchinger, W. Goymann, L. Fusani, M. Cardinale, R. R. Alan, and S. R.  
586 McWilliams (2015). Migrating songbirds on stopover prepare for, and recover from,  
587 oxidative challenges posed by long-distance flight. *Ecology and Evolution* 5:3198–3209.
- 588 Smith, A. D., and S. R. McWilliams (2014). What to do when stopping over: Behavioral  
589 decisions of a migrating songbird during stopover are dictated by initial change in their  
590 body condition and mediated by key environmental conditions. *Behavioral Ecology*  
591 25:1423–1435.
- 592 Somveille, M., A. Manica, and A. S. L. Rodrigues (2019). Where the wild birds go:  
593 explaining the differences in migratory destinations across terrestrial bird species.

- 594           Ecography 42:225–236.
- 595   Somveille, M., A. S. L. Rodrigues, and A. Manica (2015). Why do birds migrate? A  
596           macroecological perspective. *Global Ecology and Biogeography* 24:664–674.
- 597   Somveille, M., A. S. L. Rodrigues, and A. Manica (2018). Energy efficiency drives the global  
598           seasonal distribution of birds. *Nature Ecology and Evolution* 2:962–969.
- 599   Su, Y.-S., M. Yajima, M. Y.-S. Su, and J. SystemRequirements (2015). Package ‘R2jags.’ R  
600           package version 0.03-08, URL <http://CRAN.R-project.org/package=R2jags>.
- 601   Taylor, P. D., S. A. Mackenzie, B. G. Thurber, A. M. Calvert, A. M. Mills, L. P. McGuire,  
602           and C. G. Guglielmo (2011). Landscape movements of migratory birds and bats reveal  
603           an expanded scale of stopover. *PLoS ONE* 6:e27054.
- 604   Tsvey, A., V. N. Bulyuk, and V. Kosarev (2007). Influence of body condition and weather on  
605           departures of first-year European robins, *Erithacus rubecula*, from an autumn migratory  
606           stopover site. *Behavioral Ecology and Sociobiology* 61:1665–1674.
- 607   Warnock, N. (2010). Stopping vs. staging: The difference between a hop and a jump. *Journal*  
608           of *Avian Biology* 41:621–626.
- 609   Wikelski, M., A. Raim, E. M. Tarlow, R. P. Larkin, G. H. Visser, and R. H. Diehl (2003).  
610           Costs of migration in free-flying songbirds. *Nature* 423:704–704.
- 611   Zehnder, S., S. Åkesson, F. Liechti, and B. Bruderer (2001). Nocturnal autumn bird migration  
612           at Falsterbo, South Sweden. *Journal of Avian Biology* 32:239–248.
- 613   Zúñiga, D., Y. Gager, H. Kokko, A. M. Fudickar, A. Schmidt, B. Naef-Daenzer, M. Wikelski,  
614           and J. Partecke (2017). Migration confers winter survival benefits in a partially

615            migratory songbird. *eLife* 6:1–12.

616

Table 1: Mean value, standard deviation and credible intervals (CI) for each covariate effect on the probability of staying at the stopover area. Bold: significant effects.

|                                       | <i>Mean</i>   | <i>Sd</i>    | <i>CI</i>             |
|---------------------------------------|---------------|--------------|-----------------------|
| $(\alpha)$ <i>Intercept</i>           | 6.159         | 0.175        | 5.843, 6.578          |
| $(\beta_1)$ <i>Time Since Arrival</i> | <b>-1.538</b> | <b>0.039</b> | <b>-1.652, -1.432</b> |
| $(\beta_2)$ <i>Wind</i>               | 0.116         | 0.1          | -0.121, 0.196         |
| $(\beta_3)$ <i>Temperature</i>        | -0.207        | 0.89         | -0.387, 0.03          |
| $(\beta_4)$ <i>Cloud cover</i>        | 0.142         | 0.101        | -0.052, 0.207         |
| $(\beta_5)$ <i>Humidity</i>           | <b>0.497</b>  | <b>0.121</b> | <b>0.261, 0.735</b>   |
| $(\beta_6)$ $\Delta$ <i>Pressure</i>  | <b>-0.702</b> | <b>0.23</b>  | <b>-1.176, -0.196</b> |

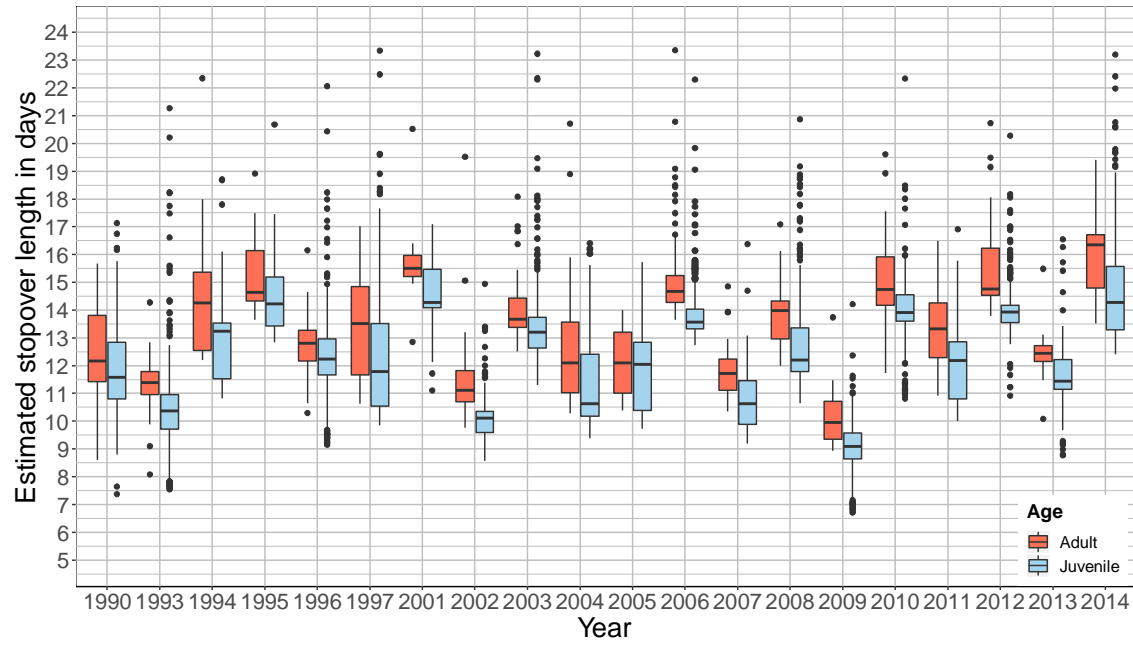

Figure 1: Between-year variation in individual stopover duration estimates (in days) per age category for the Sedge Warbler (*Acrocephalus schoenobaenus*).

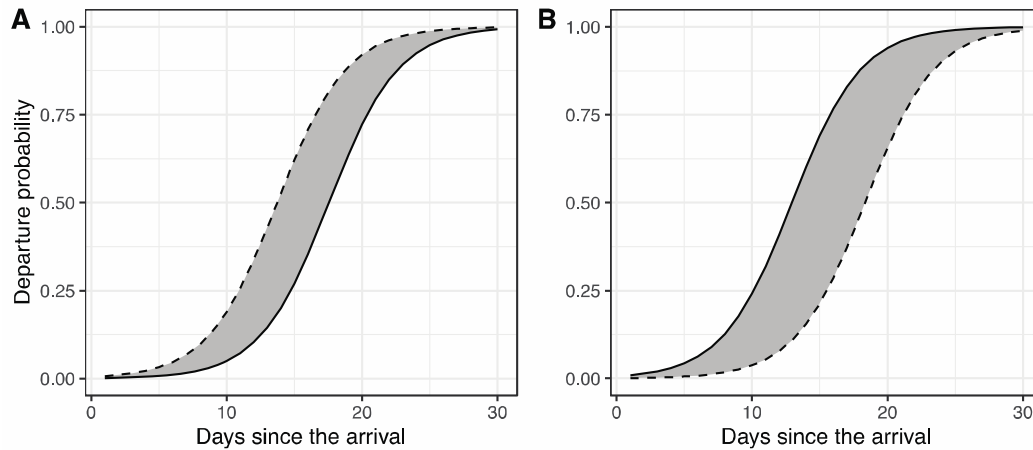

Figure 2: Departure probability as a function of the number of days since the bird arrived. **(A)** For different humidity conditions, dashed line: low humidity conditions (~70%); plain: high humidity conditions (~90%). **(B)** For different  $\Delta$ Pressure conditions, dashed line: a substantial decrease of atmospheric pressure (-5Hpa); plain: a substantial increase of atmospheric pressure (+5Hpa). The grey area represents departure probability values for humidity between 70 and 90% (a) and  $\Delta$ Pressure between -5Hpa and +5Hpa.
